# Supplementary figures and images for: The WOX Genes from the Intermediate Clade: Influence on the Somatic Embryogenesis in Medicago truncatula
Source: MDPI journal article supplement (doi:10.3390/plants13020223), 2024-01-13

A

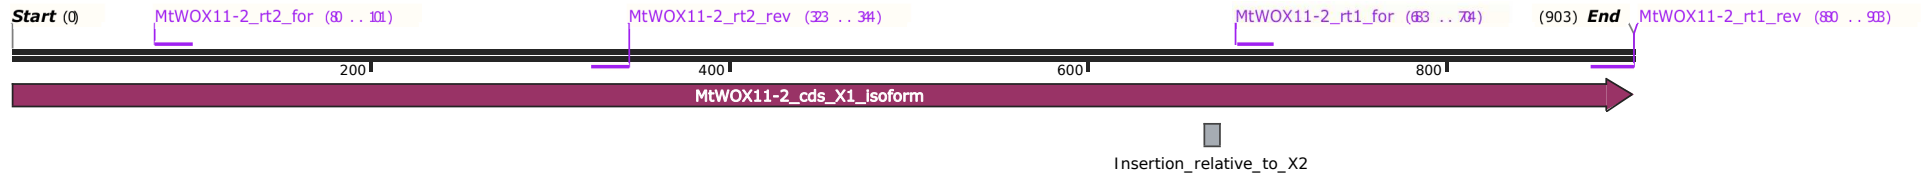

B

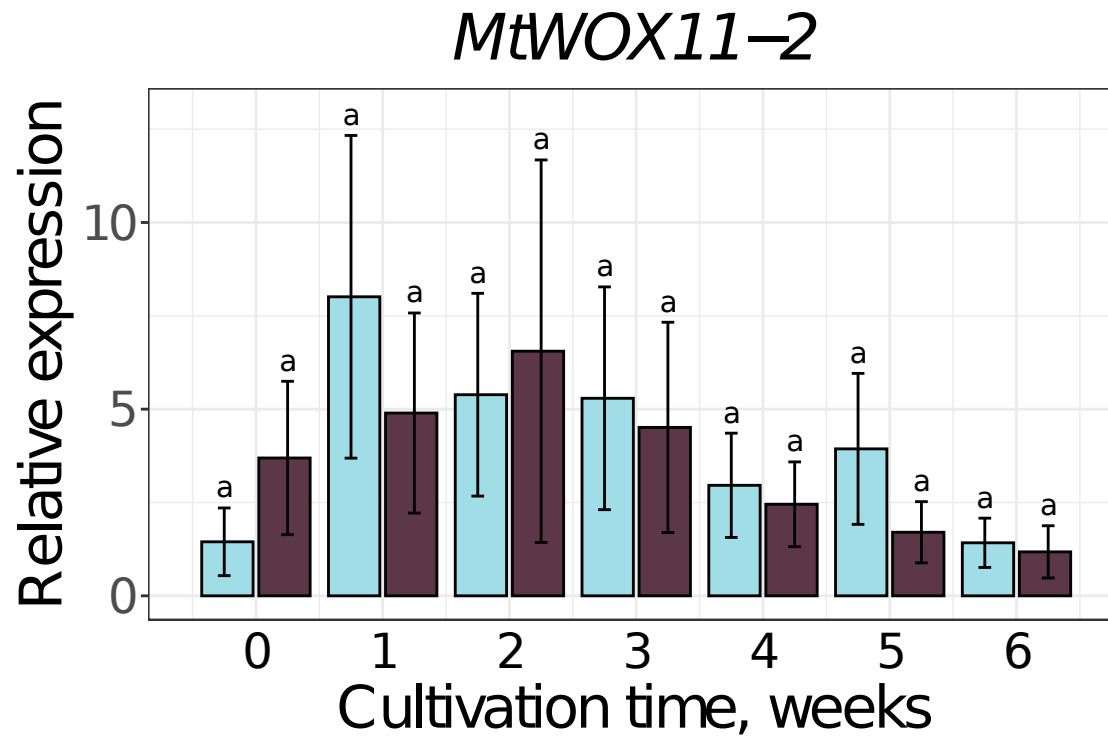

Supplement: s1 [file s1]

# Genotype

MtWOX9-1oe

GUSoe

No embryos

24

36

Embryos

16

1

Phenotype

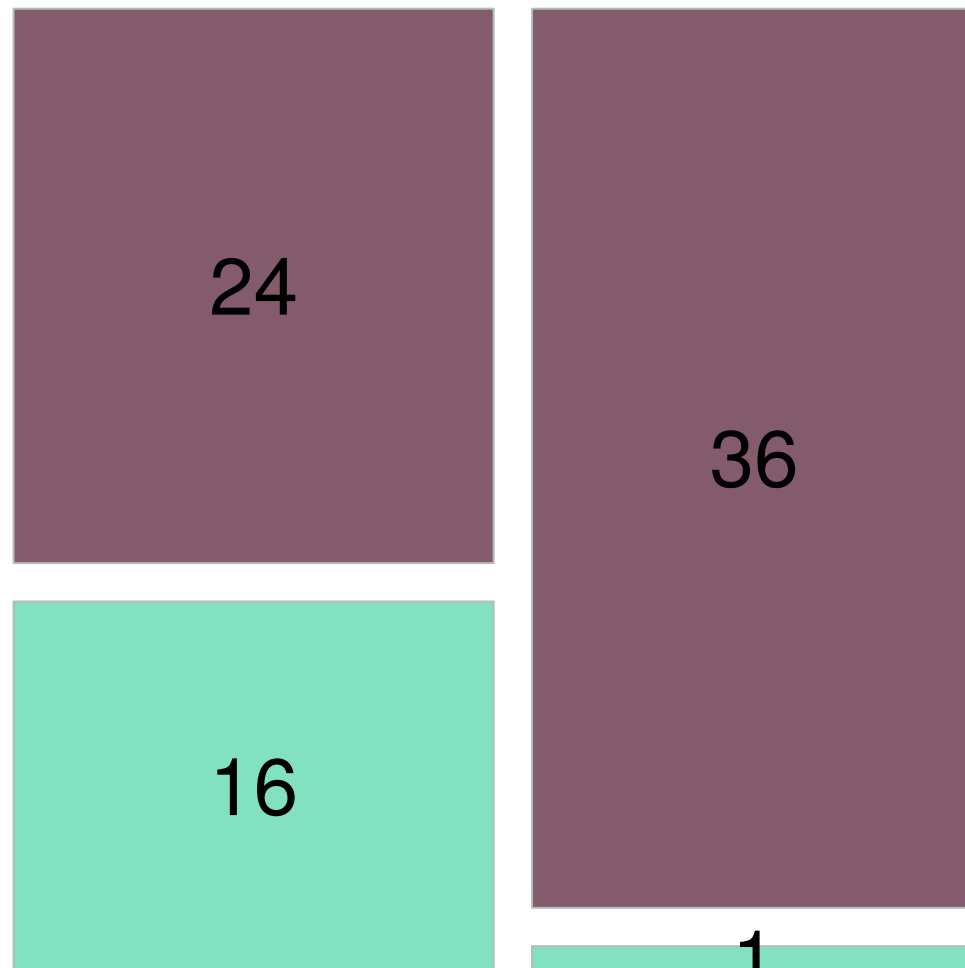

Supplement: s1 [file s1]
